# Supplementary material for: Fabrication of MoS2/rGO hybrids as electrocatalyst for water splitting applications
Source: Royal Society of Chemistry journal article supplement (doi:10.1039/d4ra00697f), 2024-01-01
Supplement: d4ra00697f1.pdf [file d4ra00697f1.pdf]

## Supplimentary data file

### Fabrication of MoS<sub>2</sub>/rGO hybrids as electrocatalyst for water splitting applications

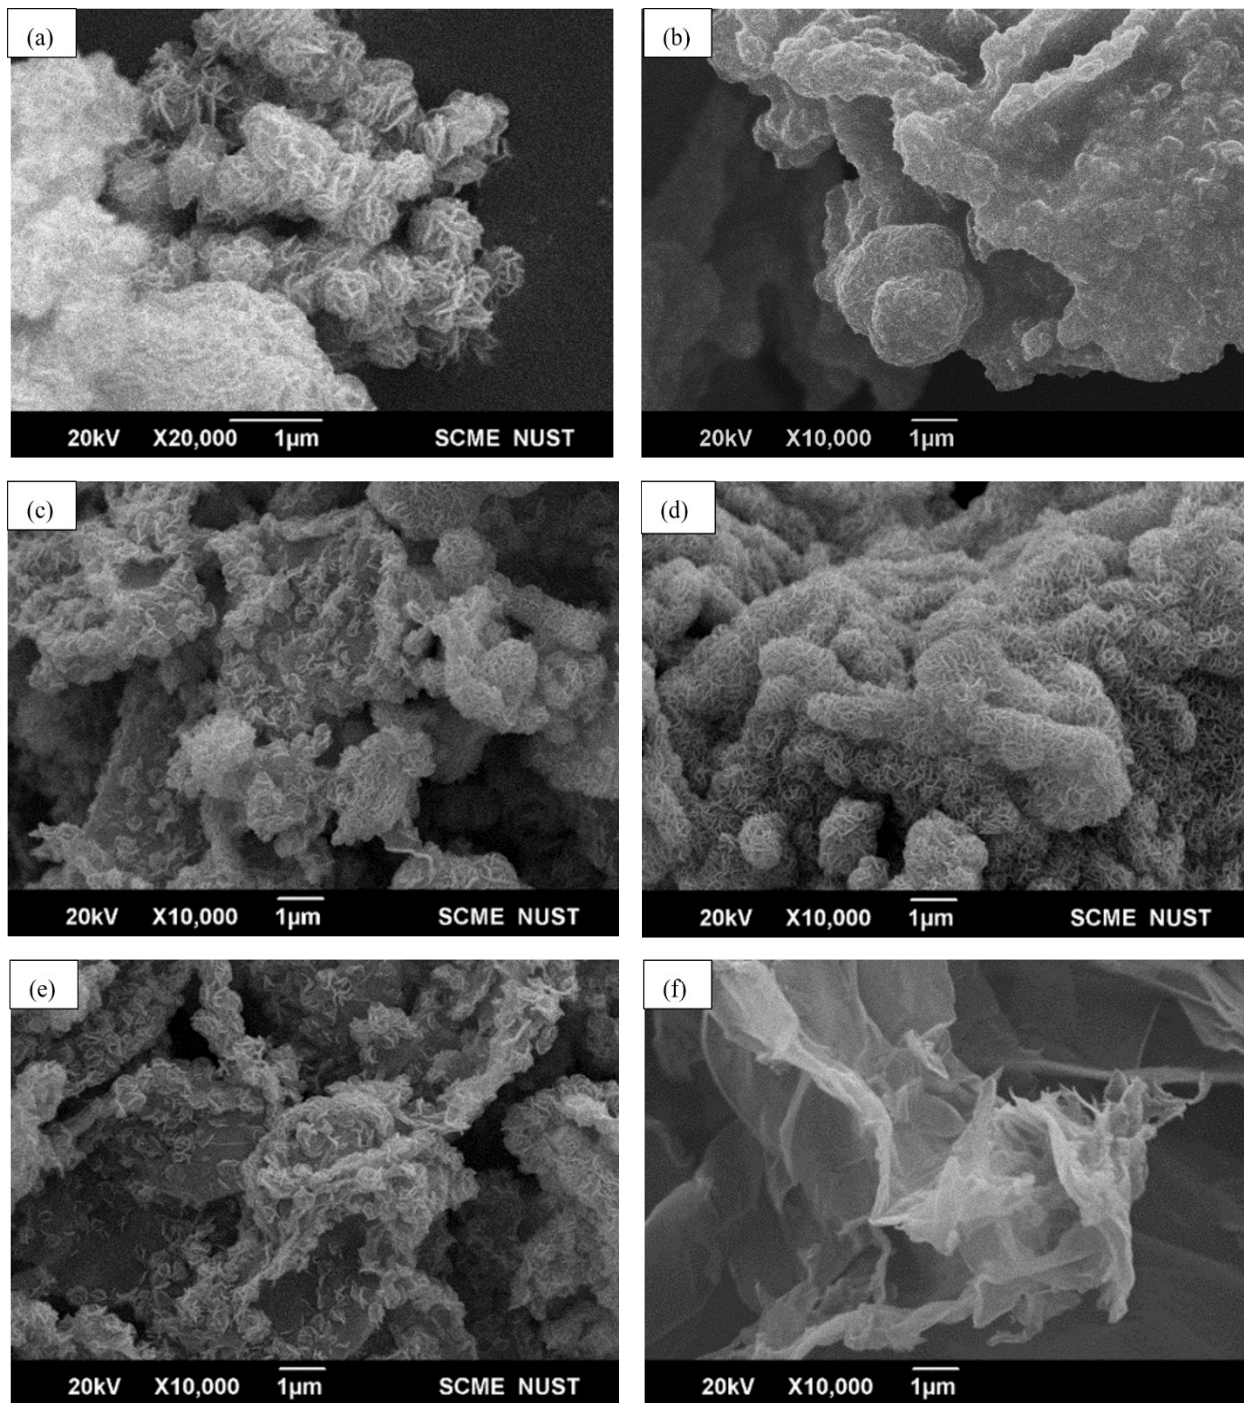

Figure S1: SEM images of (a) Pure MoS<sub>2</sub> (b) 1 wt % MoS<sub>2</sub>/rGO (c) 3 wt % MoS<sub>2</sub>/rGO (d) 5 wt % MoS<sub>2</sub>/rGO (e) 8 wt % MoS<sub>2</sub>/rGO (f) rGO sheets

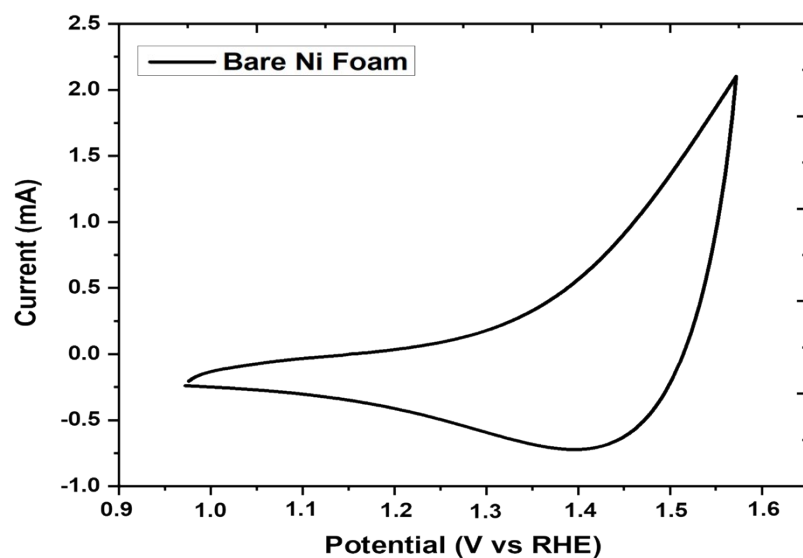

Figure S2.: Cyclic voltammetry of bare nickel foam in 1 M KOH

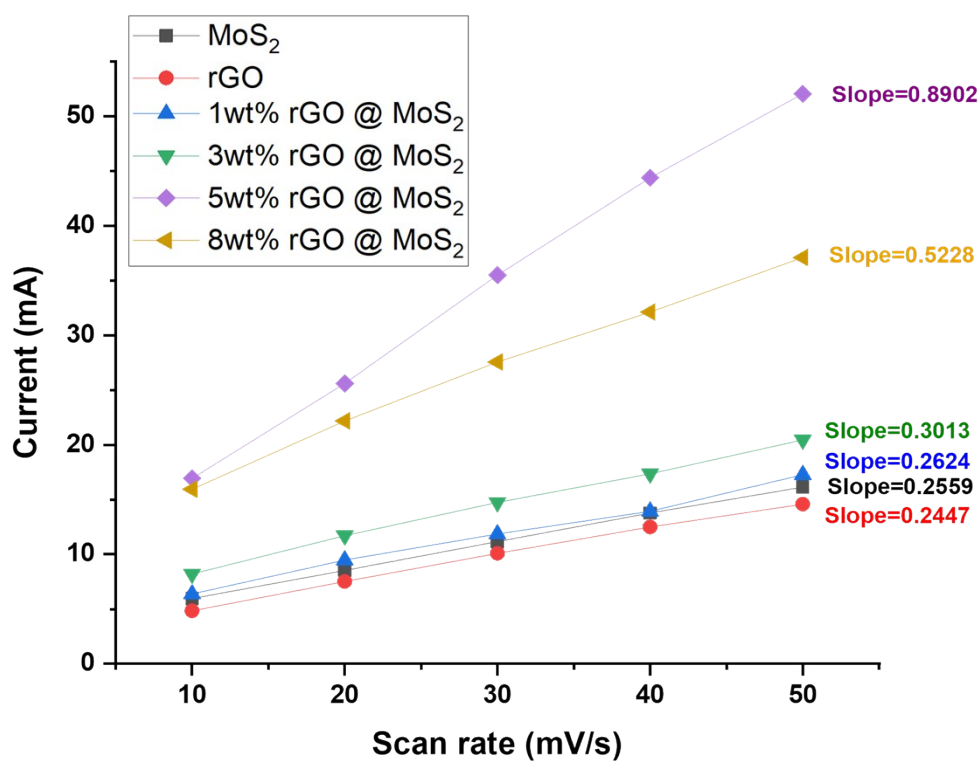

Figure S3: Electrochemical surface comparison for pure MoS<sub>2</sub>, rGO, 1, 3, 5 and 8 wt % hybrids

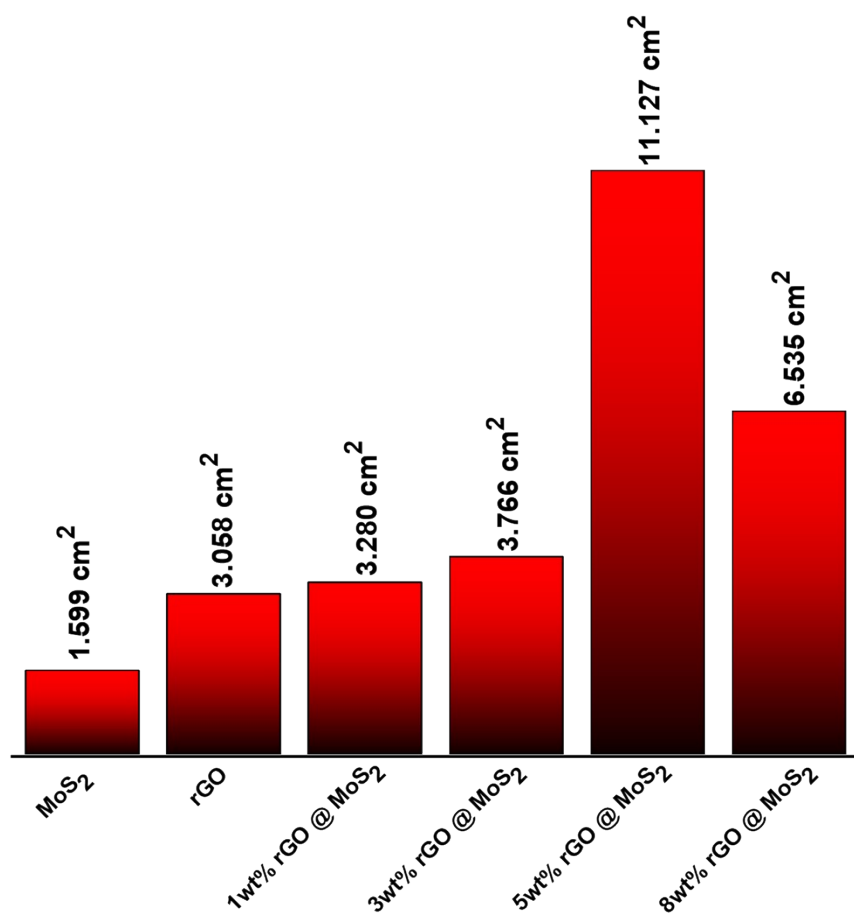

Figure S4: Electrochemical surface Area comparison for pure MoS<sub>2</sub>, rGO, 1, 3, 5 and 8 wt % hybrids
